# Supplementary material
Source: PubMed Central journal article supplement (PMC2723011)
Supplement: blood-2009-03-208249_1.pdf [file blood-2009-03-208249_1.pdf]

|                                 | All patients | Patients                 |                          |
|---------------------------------|--------------|--------------------------|--------------------------|
|                                 | N = 85       | < IL-17 Median<br>N = 43 | > IL-17 median<br>N = 42 |
| Age                             |              |                          |                          |
| Range                           | 25 – 80      | 26 – 80                  | 25 – 80                  |
| Mean ± SD                       | 61 ± 12      | 60 ± 11                  | 61 ± 12                  |
| FIGO stage                      |              |                          |                          |
| II (A-C)                        | 5            | 2                        | 3                        |
| III (A-C)                       | 52           | 25                       | 27                       |
| IV                              | 28           | 16                       | 12                       |
| Histological Type               |              |                          |                          |
| Serous, Mucinous, Endometrioid  | 54           | 30                       | 24                       |
| Clear cell and Undifferentiated | 31           | 13                       | 18                       |
| Tumor grade                     |              |                          |                          |
| G1                              | 11           | 7                        | 4                        |
| G2                              | 13           | 5                        | 8                        |
| G3                              | 59           | 29                       | 30                       |
| G4                              | 2            | 2                        | 0                        |
| Residual disease                |              |                          |                          |
| Optimal                         | 52           | 28                       | 24                       |
| Suboptimal                      | 33           | 15                       | 18                       |
| Chemotherapy*                   |              |                          |                          |
| PAC or/and PC                   | 46           | 24                       | 22                       |
| TP                              | 39           | 19                       | 20                       |

Note: 201 ovarian cancer patients were studied. Survival data are available for 85 patients.

\*PC: Cyclophosphamide and cisplatin

PAC: Cyclophosphamide and cisplatin and doxorubicin

TP: Taxane and platinum
